# Supplementary material for: Unique lead adsorption behavior of ions sieves in pellet-like reduced graphene oxide
Source: Royal Society of Chemistry journal article supplement (doi:10.1039/c5ra06493g), 2015-01-01
Supplement: c5ra06493g1.pdf [file c5ra06493g1.pdf]

## Supporting Information

### Unique Lead Adsorption Behavior of Ions Sieves in Pellet-like Reduced

### Graphene Oxide

**Dejian Chen,<sup>a</sup> Shunxing Li,<sup>\*,a,b</sup> Liling Zou,<sup>a</sup> Fengying Zheng<sup>a,b</sup>**

<sup>a</sup> Department of Chemistry and Environment, Minnan Normal University, Zhangzhou,  
Fujian (P. R. China)

<sup>b</sup> Fujian Province Key Laboratory of Modern Analytical Science and Separation  
Technology Minnan Normal University, Zhangzhou, Fujian (P. R. China)

E-mail: lishunxing@mnnu.edu.cn; shunxing\_li@aliyun.com

**Figure S1.** Element mapping of core-shell  $\alpha$ -Fe<sub>2</sub>O<sub>3</sub>@ reduced graphene oxide nanoparticles.

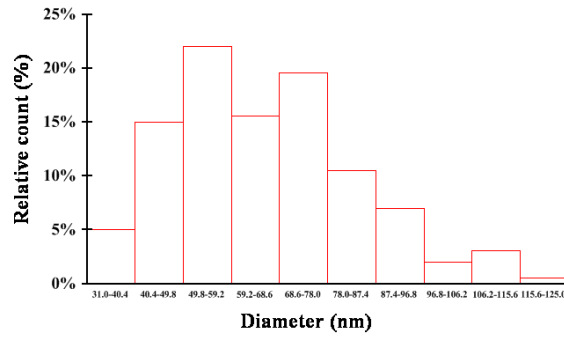

**Figure S2.** Size distribution of pellet like reduced graphene oxide spheres.

**Figure S3.** XRD pattern of RGO and P-RGO.

**Figure S4.** Zeta potential of the P-RGO at different pH.

Table S1. Specific surface area of RGO and P-RGO determined by BET method.

| Sample | Specific surface area ( $\text{m}^2 \text{g}^{-1}$ ) | Pore volume ( $\text{cm}^3 \text{g}^{-1}$ ) |
|--------|------------------------------------------------------|---------------------------------------------|
| RGO    | 16.75                                                | 0.053                                       |
| P-RGO  | 288.85                                               | 0.23                                        |

Table S2 Adsorption capacity of lead ions on various adsorbents.

| Sorbent                                          | Sorption Capacity<br>(mg/g) | S <sub>BET</sub><br>(m <sup>3</sup> /g) | Reference |
|--------------------------------------------------|-----------------------------|-----------------------------------------|-----------|
| amino-functionalized hexagonal mesoporous silica | 90.7,                       | 1042.7                                  | 1         |
| Activated carbons obtained from sawdust          | 17.5                        | 1100                                    | 2         |
| Peanut shell activated carbon                    | 35.5                        | 1019                                    | 3         |
| chitosan                                         | 77.02                       | 6.22,                                   | 4         |
| activated carbon-chitosan complex                | 125.4                       | 152.8                                   | 4         |
| activated carbon                                 | 40.119                      | 1053                                    | 5         |
| Graphene nanosheets                              | 35.46                       | N.G.                                    | 6         |
| Titanium Carbide                                 | 140.1                       | 484                                     | 7         |
| Tourmaline                                       | 108                         | 2.64                                    | 8         |
| diatomite                                        | 25.01                       | 4.11                                    | 9         |
| Activated carbon                                 | 147                         | 1688                                    | 10        |
| Titanium dioxide/carbon nanotube composites      | 137                         | N.G.                                    | 11        |
| carbon nanotube                                  | 33                          | N.G.                                    | 11        |
| Pellet-like Reduced Graphene Oxide               | 184.5                       | 288.85                                  | This work |

Note: "N.G." refer to no given of S<sub>BET</sub>.

### Reference

S1 K. Wei, L. Shu, W. Guo, Y. Wu and X. Zeng, *Chinese J. Chem.*, 2011, 29, 143.

S2 L. Giraldo and J. C. Moreno-Piraján, *Braz. J. Chem. Eng.*, 2008, 25, 143.

S3 T. Xu and X. Liu. *Chinese J. Chem. Eng.*, 2008, 16, 401.

S4 H. Ge and X. Fan, *Chem. Eng. & Technol.*, 2011, 34, 1745.

S5 X. Song, H. Liu, L. Cheng and Y. Qu, *Desalination*, 2010, 255, 78.

S6 Z. H. Huang, X. Zheng, W. Lv, M. Wang, Q. H. Yang and F. Kang, *Langmuir*, 2011, 27, 7558.

S7 Q. Peng, J. Guo, Q. Zhang, J. Xiang, B. Liu, A. Zhou, R. Liu and Y. Tian, *J. Am. Chem. Soc.*, 2014, 136, 4113.

S8 C. P. Wang, J. Z. Wu, H. W. Sun, T. Wang, H. B. Liu and Y. Chang, *Ind. Eng.*

*Chem. Res.* 2011, 50, 8515.

S9 M. Irani, M. Amjadi and M. A. Mousavian, *Chem. Eng. J.* 2011, 178, 317.

S10 Y. Li, Q. Du, X. Wang, P. Zhang, D. Wang, Z. Wang and Y. Xia, *J. Hazard.*

*Mater.* 2010, 183, 583.

S11 X. Zhao, Q. Jia, N. Song, W. Zhou and Y. Li, *J. Chem. Eng. Data* 2010, 55, 4428.
